# Supplementary material for: Reduction in Toxicity of Polystyrene Nanoplastics Combined with Phenanthrene through Binding of Jellyfish Mucin with Nanoplastics
Source: MDPI journal article supplement (doi:10.3390/nano12091427), 2022-04-22
Supplement: s1 [file s1]

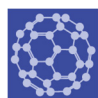

## Supplementary Materials

Sun Woo Geum <sup>1</sup> and Min-Kyeong Yeo <sup>1,2,\*</sup>

<sup>1</sup> Department of Applied Environmental Science, Graduate School of Engineering, Kyung Hee University, 1732 Deogyong-daero, Giheung-gu, Yongin-si, Gyeonggi-do 17104, Republic of Korea

<sup>2</sup> Department of Environmental Science and Engineering, College of Engineering, Kyung Hee University, 1732 Deogyong-daero, Giheung-gu, Yongin-si, Gyeonggi-do 17104, Republic of Korea

\* Corresponding author's e-mail addresses and phone numbers:

Min-Kyeong Yeo: bioclass@khu.ac.kr; +82-31-201-2413

**Table S1.** Particle diameter and zeta potential analyses of PS-NP, PS-NP + Mu, PS-NP + Phe, and PS-NP + Phe + Mu.

|                  | Diameter [nm] | Zetapotential [mV] |
|------------------|---------------|--------------------|
| PS-NP            | 2132 ± 90.86  | -7.49 ± 1.12       |
| PS-NP + Mu       | 3392 ± 129.90 | -3.37 ± 0.58       |
| PS-NP + Phe      | 1614 ± 85.56  | -12.34 ± 1.95      |
| PS-NP + Phe + Mu | 7277 ± 277.3  | -5.13 ± 0.07       |

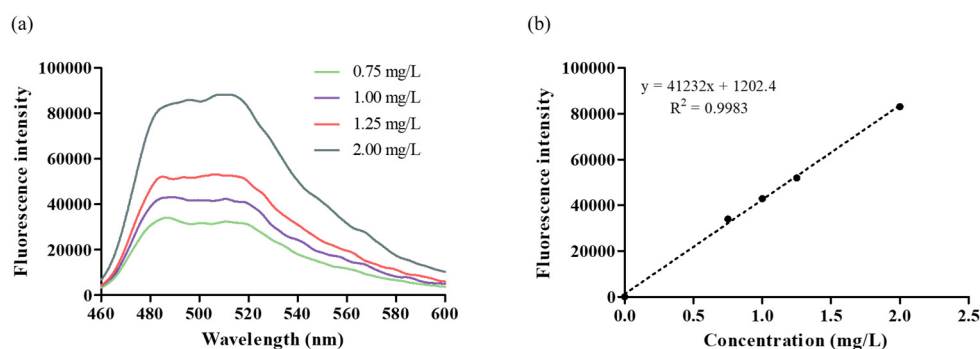

**Figure S1.** (a) Fluorescence intensity by concentration of PS-NP, (b) standard curve generated from the obtained fluorescence intensity. Linear relationship between fluorescence intensity and concentration of PS-NP.

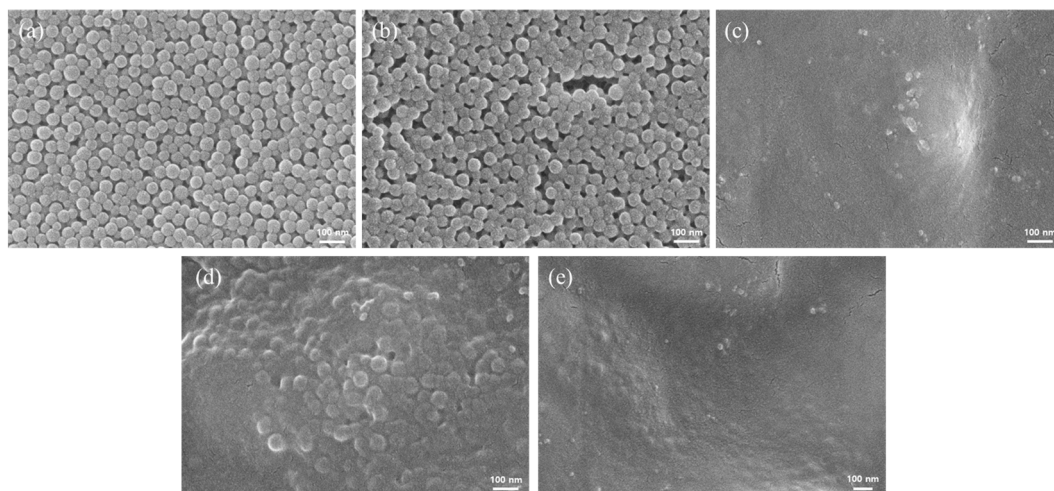

**Figure S2.** FE-SEM images of (a) PS-NP, (b) PS-NP + Phe, (c) Mu, (d) PS-NP + Mu, and (e) PS-NP + Phe + Mu.

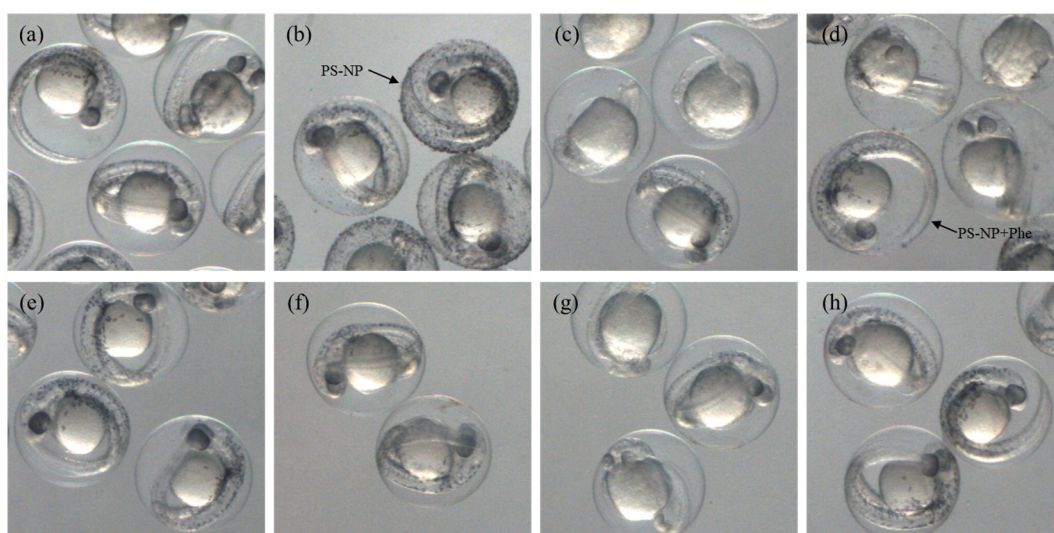

**Figure S3.** (a) Control, (b) PS-NP (5.0 mg/L), (c) Phe (1.0 mg/L), (d) PS-NP + Phe, (e) Mu (50  $\mu$ g/mL), (f) PS-NP + Mu, (g) Phe + Mu, and (h) PS-NP + Phe + Mu after exposure of 32 h; (arrow in (b) represents PS-NP, and arrow in (d) represents PS-NP + Phe).
